# Supplementary material for: Rational La-doped hematite as an anode and hydrous cobalt phosphate as a battery-type electrode for a hybrid supercapacitor
Source: Royal Society of Chemistry journal article supplement (doi:10.1039/d1dt04164a), 2022-01-01
Supplement: d1dt04164a1.pdf [file d1dt04164a1.pdf]

Rational La-doped hematite as an anode and hydrous cobalt phosphate as a battery-type  
electrode for a hybrid supercapacitor

Navajsharif S. Shaikh,<sup>a,b</sup> Vaibhav. C. Lokhande,<sup>cd</sup> Taeksoo Ji,<sup>cd\*\*</sup> Shivaji Ubale,<sup>b</sup> Vikas j. Mane,<sup>b</sup>  
Chandrakant D Lokhande,<sup>b</sup> Haseen M Shaikh,<sup>e</sup> Jasmin. S. Shaikh,<sup>f</sup> Supareak Praserttham,<sup>f</sup> Sandip  
Sabale,<sup>g</sup> Pongsakorn Kanjanaboos<sup>ah\*</sup>

<sup>a</sup>School of Materials Science and Innovation, Faculty of Science, Mahidol University,  
Nakhon Pathom, 73170, Thailand

<sup>b</sup>Centre of Interdisciplinary Research, D. Y. Patil University, Kolhapur, Maharashtra, 416006, India

<sup>c</sup>Department of Electronics and Computer Engineering, Chonnam National University, Gwangju,  
61186, South Korea

<sup>d</sup>Department of ICT Convergence System Engineering, Chonnam National University, Gwangju,  
61186, South Korea

<sup>e</sup>Sardar Patel College of Engineering, Andheri West Mumbai, Maharashtra, 400053, India

<sup>f</sup>Department of Chemical Engineering, Faculty of Engineering, Chulalongkorn University, Bangkok,  
10330, Thailand

<sup>g</sup>Jaysingpur College, P.G. Department of Chemistry, Jaysingpur, Maharashtra, 416101, India

<sup>h</sup>Center of Excellence for Innovation in Chemistry (PERCH-CIC), Ministry of Higher Education,  
Science, Research and Innovation, Bangkok, 10400, Thailand

Corresponding author emails: [\\*\\*tji@chonnam.ac.kr](mailto:**tji@chonnam.ac.kr) [\\*Pongsakorn.kan@mahidol.edu](mailto:*Pongsakorn.kan@mahidol.edu)

Supporting Information:

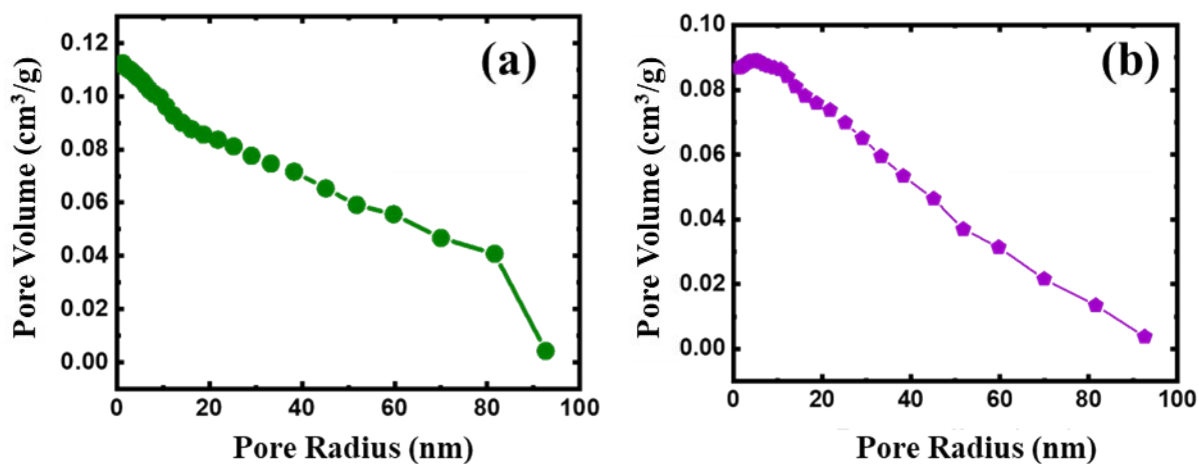

Figure S1. (a) BJH graph for 7.5%La-HMT and (b) BJH graph for CoPO.

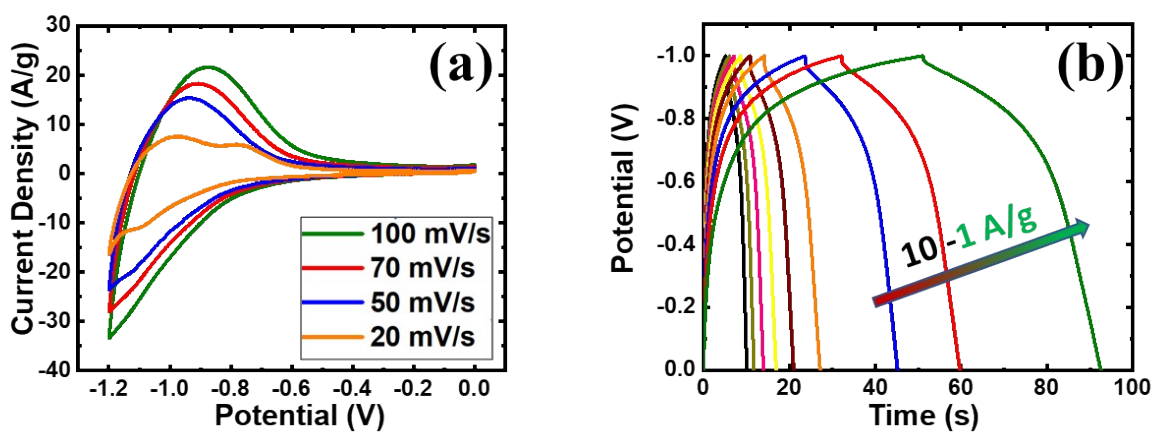

Figure S2. (a) CV curves of HMT at 20-100 mV/s scan rates and (b) GCD curves of HMT.

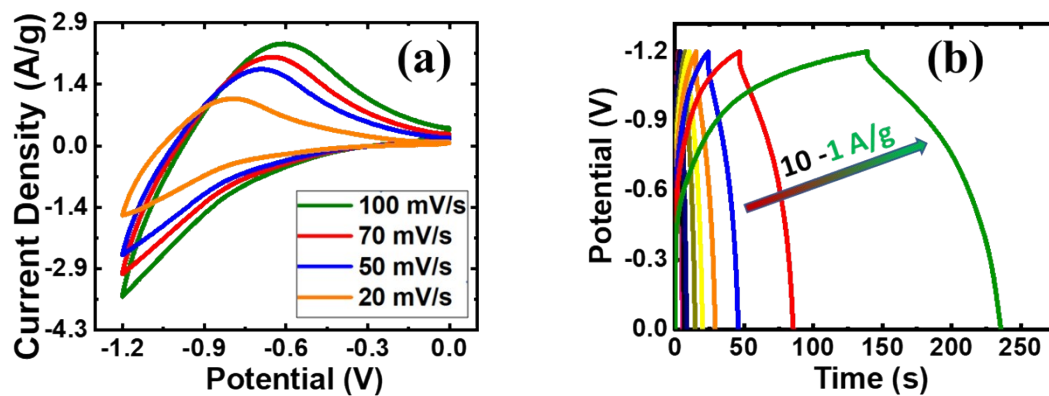

**Figure S3.** (a) CV curves of 2.5%La-HMT at 20-100 mV/s scan rates and (b) GCD curves of 2.5%La-HMT.

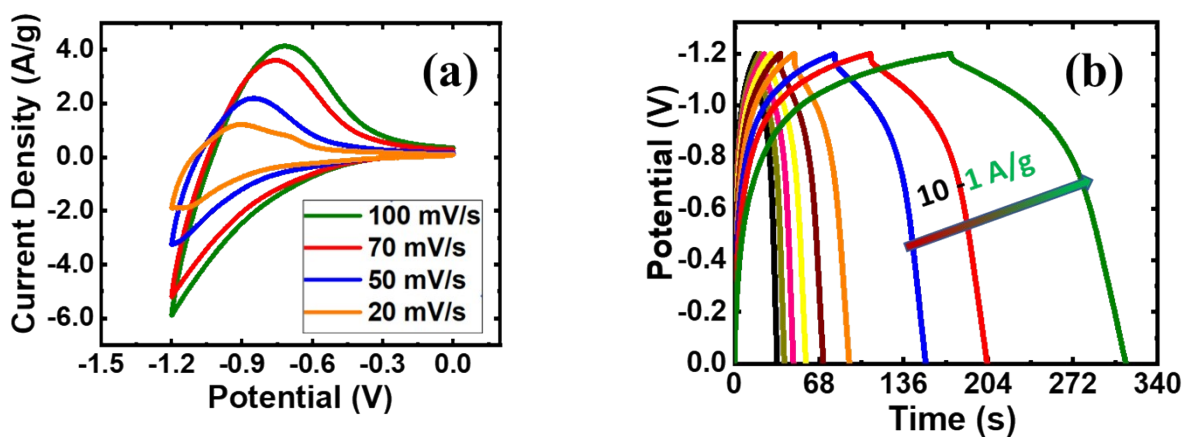

**Figure S4.** (a) CV curves of 5%La-HMT at 20-100 mV/s scan rate and (b) GCD curves of 5%La-HMT.

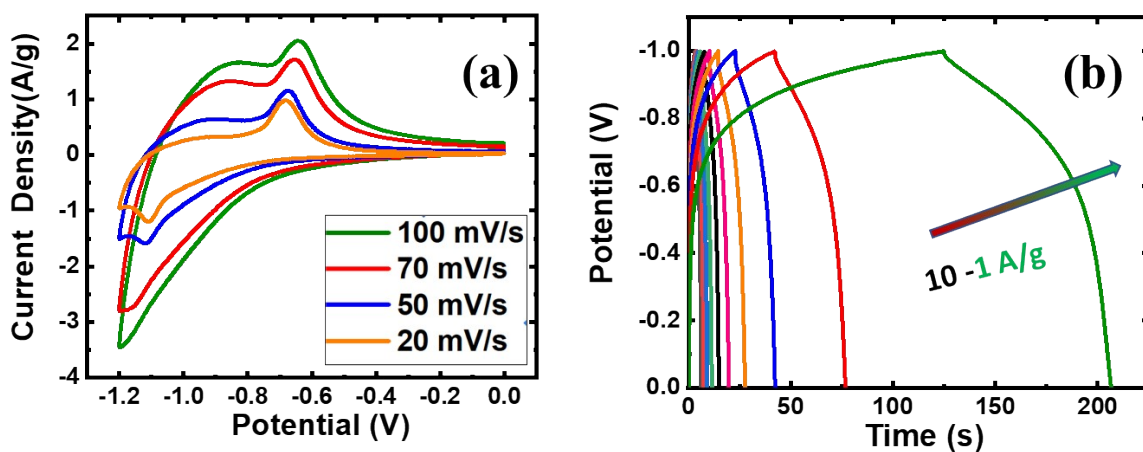

**Figure S5.** (a) CV curves of 10%La-HMT at 20-100 mV/s scan rates and (b) GCD curves of 10 %La-HMT.

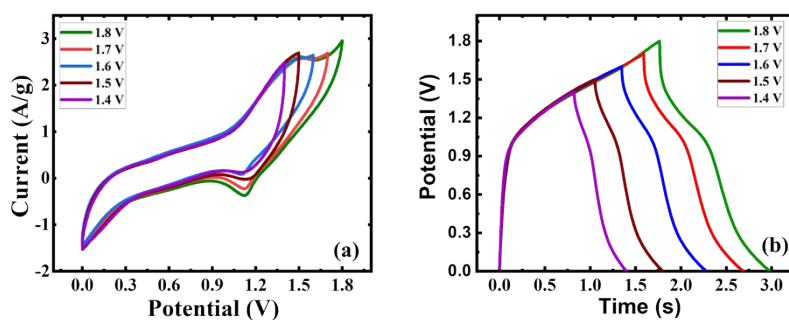

**Figure S6.** (a and b) Optimization of potential windows of Aq-HSC.
